# Supplementary material
Source: PubMed Central journal article supplement (PMC6079119)
Supplement: ajtr0010-2184-f6.pdf [file ajtr0010-2184-f6.pdf]

# Safety and tolerability of tamoxifen in mice renal injury

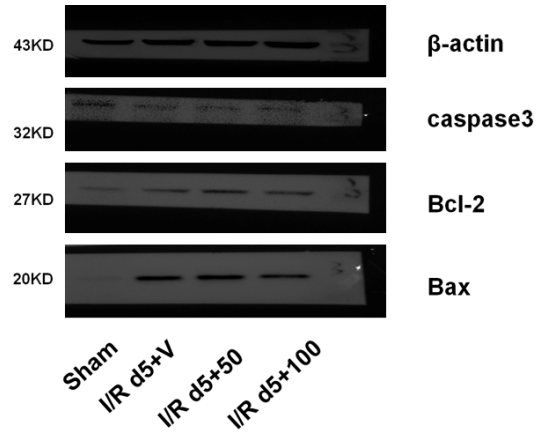

Figure S1. Original image of WB in Figure 2.

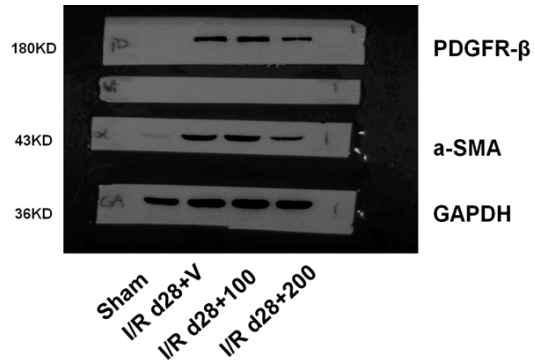

Figure S2. Original image of WB in Figure 5.
